# Supplementary material
Source: Research Square preprint supplement (doi:10.21203/rs.3.rs-9296181/v1)
Supplement: Supplementary file 1 [file db0bec9fece3c65f013abe55.docx]

**TEST QUESTION PAPER**

**SECTION A: Demographic Data**

This section provides information about the socio-Demographic characteristics of the respondents.

1. Age as at last birthday: Less than 25 years ( ), 25 - 34 years ( ), 35 - 44 years ( ), 45 years and above ( )
2. Tribe (a) Yoruba (b) Hausa (c) Igbo (d) Others
3. Educational qualification: No formal Education ( ) Primary level ( ), Secondary Level ( ) Post-Secondary ( ), First Degree ( ), Postgraduate ( )

**Section B: Knowledge of HPV vaccine**

**Instructions:** Below are questions related to the knowledge of HPV vaccine. Kindly pick the correct answer.

1. What does HPV stand for?

a) Human Protein Virus

b) Human Papillomavirus

c) Hepatitis Papillomavirus

d) Human Plasma Virus

Correct Answer: b) Human Papillomavirus

1. What is the primary purpose of the HPV vaccine?

a) To prevent common colds

b) To prevent skin infections

c) To prevent cervical cancer

d) To treat flu symptoms

Correct Answer: c) To prevent cervical cancer

1. At what age is the HPV vaccine typically recommended?

a) At birth

b) 6 months old

c) 9 to 14 years old

d) 25 years old

Correct Answer: c) 9 to 14 years old

1. Who is the HPV vaccine primarily recommended for?

a) Elderly people

b) Only boys

c) Children and adolescents

d) Pregnant women

Correct Answer: c) Children and adolescents

1. How is the HPV vaccine administered?

a) Orally

b) Through a skin patch

c) By injection

d) As a nasal spray

Correct Answer: c) By injection

1. How many doses of the HPV vaccine are generally required for full protection?

a) 1 dose

b) 2 doses

c) 4 doses

d) 5 doses

Correct Answer: b) 2 doses

1. Which gender can receive the HPV vaccine?

a) Only girls

b) Only boys

c) Both boys and girls

d) Only adults

Correct Answer: c) Both boys and girls

1. HPV is primarily transmitted through which of the following ways?

a) Coughing and sneezing

b) Sexual contact

c) Contaminated food

d) Insect bites

Correct Answer: b) Sexual contact

1. What health problem is HPV most commonly associated with?

a) Diabetes

b) Skin rashes

c) Cervical cancer

d) Heart disease

Correct Answer: c) Cervical cancer

1. Can the HPV vaccine protect against all types of HPV?

a) Yes, it protects against all types

b) No, it only protects against a few types

c) It only protects against one type

d) It doesn’t protect against any types

Correct Answer: b) No, it only protects against a few types

1. Is the HPV vaccine effective in preventing cervical cancer?

a) Yes

b) No

c) Only in boys

d) Only in adults

Correct Answer: a) Yes

1. How long does the protection from the HPV vaccine last?

a) 1 year

b) 5 years

c) At least 10 years

d) Lifetime

Correct Answer: c) At least 10 years

1. Can the HPV vaccine be given to someone who is already sexually active?

a) No, it is too late

b) Yes, but it may be less effective

c) Only if they are over 30 years old

d) Only to males

Correct Answer: b) Yes, but it may be less effective

1. What is a common side effect of the HPV vaccine?

a) Severe allergic reactions

b) Soreness at the injection site

c) Permanent nerve damage

d) Hair loss

Correct Answer: b) Soreness at the injection site

1. Is the HPV vaccine recommended for pregnant women?

a) Yes

b) No

c) Only in the first trimester

d) Only if over 30 years old

Correct Answer: b) No

1. Can the HPV vaccine cure existing HPV infections?

a) Yes, it cures HPV

b) No, it cannot cure existing infections

c) Only in children

d) Only in adults

Correct Answer: b) No, it cannot cure existing infections

1. Why is it important to vaccinate children before they become sexually active?

a) Because the vaccine is more effective before exposure to the virus

b) Because it prevents all diseases

c) Because it’s the only time it can be given

d) Because it helps them grow taller

Correct Answer: a) Because the vaccine is more effective before exposure to the virus

1. Does the HPV vaccine replace the need for cervical cancer screening?

a) Yes, no screening is needed

b) No, regular screening is still important

c) Only if the vaccine is given before age 10

d) Only in boys

Correct Answer: b) No, regular screening is still important

1. Which of the following is a myth about the HPV vaccine?

a) It protects against cervical cancer

b) It is safe for both boys and girls

c) It causes infertility

d) It prevents certain types of HPV

Correct Answer: c) It causes infertility

1. Where can parents get their children vaccinated against HPV?

a) At a grocery store

b) At school clinics, hospitals, or health centers

c) At a bakery

d) At home without a healthcare provider

Correct Answer: b) At school clinics, hospitals, or health centers

**Appendix II**

**QUESTIONNAIRE**

**EFFECT OF NURSE-FACILITATED EDUCATIONAL INTERVENTION ON PARENTS’ KNOWLEDGE AND PERCEPTION ON SAFETY OF HUMAN PAPILLOMAVIRUS VACCINE IN OGUN STATE, NIGERIA**

**SECTION C: Perception of safety of HPV vaccines**

| **S/N** | **Perception** | **Strongly Agree** | **Agree** | **Disagree** | **Strongly Disagree** |
| --- | --- | --- | --- | --- | --- |
| 1 | HPV vaccine is not safe for children |  |  |  |  |
| 2 | HPV vaccine has serious adverse effects |  |  |  |  |
| 3 | HPV vaccine is not worth the potential risks. |  |  |  |  |
| 4 | Vaccinating children against HPV is not essential for preventing cervical cancer |  |  |  |  |
| 5 | HPV vaccine is unnecessary for children health |  |  |  |  |
| 6 | HPV vaccine might not have undergone rigorous testing to ensure its safety |  |  |  |  |
| 7 | Refusing the HPV vaccine is a safer option for children |  |  |  |  |
| 8 | HPV vaccine outweigh its benefits in preventing HPV infection and cervical cancer |  |  |  |  |
| 9 | HPV vaccine has not been proven effective and safe through extensive clinical trials |  |  |  |  |
| 10 | Healthcare providers have not adequately inform parents about the safety of the HPV vaccine. |  |  |  |  |
| 11. | I am not worried about my children contracting HPV if they are not vaccinated |  |  |  |  |
| 12. | I am concerned about potential side effects of the HPV vaccine for my children |  |  |  |  |
